# Supplementary material for: Becoming more of an insider: A grounded theory study on patients’ experience of a person-centred e-health intervention
Source: PubMed Central journal article supplement (PMC7682879; doi:10.1371/journal.pone.0241801), 2020-11-23
Supplement: pone.0241801.s002.pdf [file pone.0241801.s002.pdf]

# Frågeguide svenska

## Inledande fråga

*Vill du berätta vad du tänkte när du fick reda på att du var en av dem som skulle få tillgång till personcentrerade samtal och den digitala plattformen?*

## Frågeområden

- Min Hälsa plattform (Innehåll + Utformning)
  - Länkar
  - Hälsoplan
  - Dagsform
  - Bjuda in partners
  - Introduktion/utbildning portalen
- Samtal
- Möta personal på distans
- Medium/Använt medium (Dator, surfplatta, smartphone)
- Hinder & Möjligheter (förutsättningar)
- Tidsperspektiv
- Likheter & skillnader med tidigare vårderfarenheter
- Framtid (Hur går vi vidare?)
- Målgrupp och användningsområde\*
- Egna förutsättningar\*
- Egen process\*
- Någon bryr sig\*
- Behov av "insats"/stöd – inget behov\*
- Stöd kontra Hjälp\*
- Egen kontra olika partners roll (i att hålla koll) (själv-tillsammans)\*

## Avrundande frågor

*Om du skulle berätta om E-hälsastödet (Min hälsa portal samt personcentrerade samtal) för någon som inte har varit med vad skulle du säga då?*

*Är det någonting du skulle vilja berätta som vi inte har pratat om?*

*Är det någonting annat du tycker att jag bör veta för att*

## Exempel på frågor som stöd för att fånga processer

*Vad visste du innan "interventionen" om det som...? (framkom i dialog under samtalen, fanns att läsa på plattformen osv. ).*

*Har din syn på X ändrats vid användning av E-hälsostödet?*

*Kan du berätta för mig på vilket sätt?*

*Kan du beskriva för mig vad det är som har gjort att det har förändrats?*

*\*tillagda frågeområden i linje med teoretisk sampling*
